# Supplementary material
Source: PubMed Central journal article supplement (PMC4939261)

Figure 3e

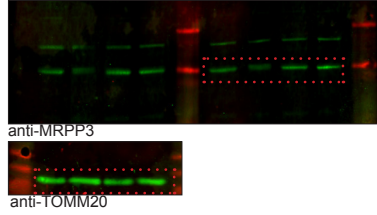

Figure 4b

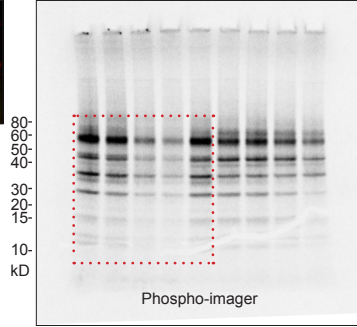

Figure 4e

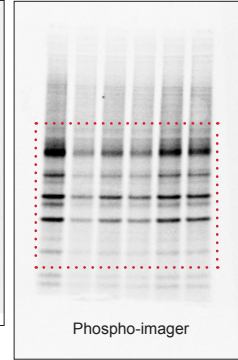

Ext Fig 6f

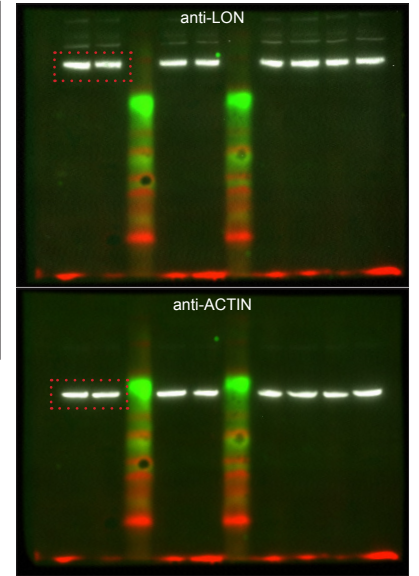

Ext Fig 1e

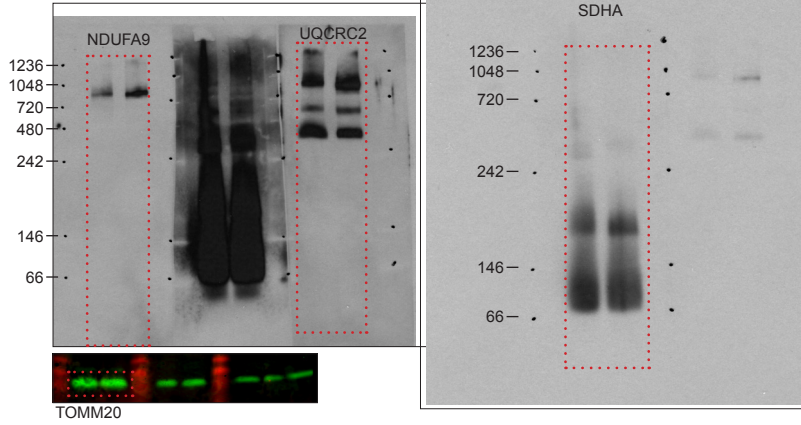

Ext Fig 7a

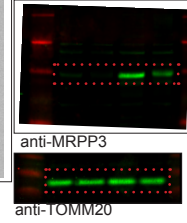

Ext Fig 8a

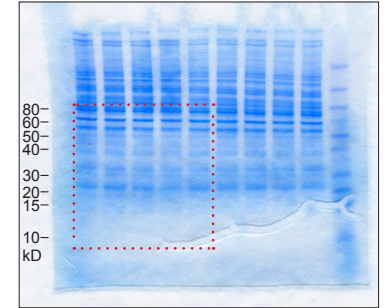

Ext Fig 8b

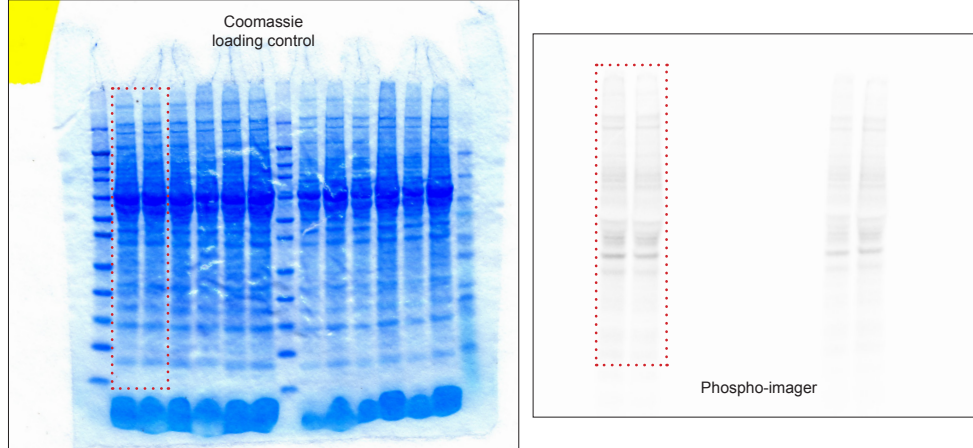

Ext Fig 10a

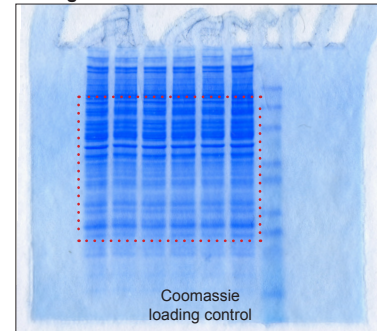

Ext Fig 10c

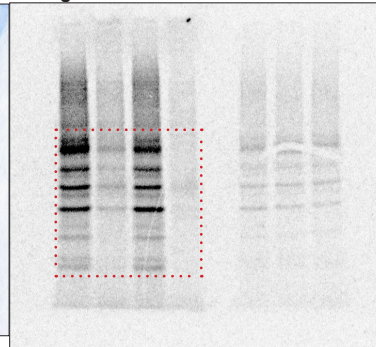

Ext Fig 10d

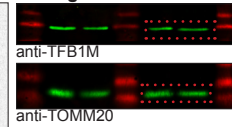

Supplement: NIHMS784697-supplement-supp_fig1.pdf [file NIHMS784697-supplement-supp_fig1.pdf]
